# Supplementary material
Source: PubMed Central journal article supplement (PMC6877314)
Supplement: jci-129-125519-s289.pdf [file jci-129-125519-s289.pdf]

Supplemental Table 2. Primers and Riboprobe sequences.

### Mouse Primers

| Gene           | Forward Primer 5'→3'           | Reverse Primer 5'→3'           |
|----------------|--------------------------------|--------------------------------|
| <i>Ezh2</i>    | GGT CGC CCT TAC AAC AGA AT     | TGA AAG TGC CAT CCT GAT CC     |
| <i>Foxm1</i>   | GGA CAT CTA CAC TTG GAT TGA GG | TGT CAT GGA GAG AAA GGT TGT G  |
| <i>Foxj1</i>   | CAC GGA CAA CTT CTG CTA CTT    | GGC ACT TTG ATG AAG CAC TTG    |
| <i>Birc5</i>   | GGA ATT GGA AGG CTG GGA A      | CCA TCT GCT TCT TGA CAG TGA    |
| <i>Aurkb</i>   | TGC AGG GAG AAC TGA AGA TTG    | CGA TGC ACC ATA GAT CTA CCA TT |
| <i>Rad51</i>   | ATT CCG AAC TGG GAA GAC AC     | ATG TAC ATG GCC TTC CCT TC     |
| <i>Ccnb1</i>   | TGA GCC TGA ACC TGA ACT TG     | ACA TCA GAG AAA GCC TGA CAC    |
| <i>Plk1</i>    | ACC TAC CTC CGG ATC AAG AAA    | AGA ACT CGT CAT TGA GCA ACT C  |
| <i>Rrm2</i>    | AGG CTA CGT ATG GAG AAC GC     | ATC AGC CCC CGT TTC TTG AG     |
| <i>Ctss</i>    | CTG CGT CAC TGA GGT GAA ATA C  | TCT GAG CAC TGA GGG ATA TCA G  |
| <i>Slc22a7</i> | TGT GTT CCG GGC ATC ATT AG     | GCA CAG ATG GAC AGG TAC TTT    |
| <i>Spr2f</i>   | GGT ACA CAC GTC CTG GAA TAC    | GTC CTG AAG ACT GCT GAA GAC    |
| <i>Gapdh</i>   | AGG TCG GTG TGA ACG GAT TTG    | TGT AGA CCA TGT AGT TGA GGT CA |
| <i>EGFP</i>    | CAA GAT CCG CCA CAA CAT CG     | CGT GCT CAG GTA GTG GTT GT     |
| <i>Ki67</i>    | GAA GTC TCT TGG CAC TCA CA     | GCG TCT TTG ATC ATT TGT CCT C  |

### Human Primers

| Gene         | Forward Primer 5'→3'              | Reverse Primer 5'→3'          |
|--------------|-----------------------------------|-------------------------------|
| <i>FOXM1</i> | AAA GGA GAA TTG TCA CCT GGA G     | TGG CCA TGT AAG AGT AGG GT    |
| <i>BIRC5</i> | CTA CAT TCA AGA ACT GGC CCT T     | CAG CTC CTT GAA GCA GAA GAA   |
| <i>AURKB</i> | CAC ACA ACG AGA CCT ATC GC        | CCT GAG CAG TTT GGA GAT GAG   |
| <i>RAD51</i> | GAA GAC CCA GAT CTG TCA TAC G     | GTG TCA ATG TAC ATG GCC TTT C |
| <i>CCNB1</i> | CCA GAA CCT GAG CCT GTT AAA       | GCA CAT CCA GAT GTT TCC ATT G |
| <i>PLK1</i>  | CAC AGT TTC GAG GTG GAT GT        | ATC CGG AGG TAG GTC TCT TT    |
| <i>PCNA</i>  | CAG ACT ATG AAA TGA AGT TGA TGG A | CGT GCA AAT TCA CCA GAA GG    |

### Mouse Riboprobes

| Gene           | 5'→3'     | Sequence                                     | Notes             |
|----------------|-----------|----------------------------------------------|-------------------|
| <i>Foxm1</i>   | Sense     | CATTTAGGTGACACTATAGGCTATCCAACCTCCTGGGAAGATTC | Adapted from (1). |
|                | Antisense | TAATACGACTCACTATAGGGCAATGTCTCCTTGATGGGGGTC   |                   |
| <i>Slc22a7</i> | Sense     | CATTTAGGTGACACTATAGTCTGGTGGTGATAGGGAAAG      |                   |
|                | Antisense | TAATACGACTCACTATAGGGCAAGAGCCTGCCTTCTATTTT    |                   |
| <i>Ctss</i>    | Sense     | CATTTAGGTGACACTATAGGTACATTCAGCTCCCGTTTG      |                   |
|                | Antisense | TAATACGACTCACTATAGGGCACTTGTTTCTCTGGATATTG    |                   |
| <i>Rrm2</i>    | Sense     | CATTTAGGTGACACTATAGCGTTGAGGATGAGCCGTTAC      |                   |
|                | Antisense | TAATACGACTCACTATAGGGCCAGTCAGCCTTCTTCTTCA C   |                   |
| <i>Spr2f</i>   | Sense     | CATTTAGGTGACACTATAGTGAATACTTTGGAGAACCTGATCC  |                   |
|                | Antisense | TAATACGACTCACTATAGGGACAAGGCTCAGGGCACA        |                   |

### Human Riboprobe

| Gene         | (5'→3')   | Sequence                                 |
|--------------|-----------|------------------------------------------|
| <i>FOXM1</i> | Sense     | CATTTAGGTGACACTATAGCCTGCCCAACAGGAGTCTAA  |
|              | Antisense | TAATACGACTCACTATAGGGGGACGCTGATGGTCTCGAAG |

### Reference:

1. Carr JR, Kiefer MM, Park HJ, Li J, Wang Z, Fontanarosa J, et al. FoxM1 regulates mammary luminal cell fate. *Cell Rep.* 2012;1(6):715-29.
